# Supplementary material for: The Mitochondrial Genome of an Aquatic Plant, Spirodela polyrhiza
Source: PLoS One. 2012 Oct 4;7(10):e46747. doi: 10.1371/journal.pone.0046747 (PMC3464924; doi:10.1371/journal.pone.0046747)
Supplement: Table S3 — Gene content for Spirodela mitochondrial genome. Gene content includes protein-coding genes, tRNA, rRNA and putative ORFs. “Ψ” means pseudo gene and “cp-” means chloroplast-derived gene. (XLS) [file pone.0046747.s003.xls]

## Sheet: Table S3
	Gene	Exon	Start	Stop	Size (bp)	Strand
Complex I	nad1				965
		exon 1	186808	186437	372	-
		exon 2	79193	79273	81	+
		exon 3	80456	80650	195	+
		exon 4	159441	159383	59	+
		exon 5	156079	155822	258	-
	nad2				1431
		exon 1	47421	47573	153	+
		exon 2	48827	49177	351	+
		exon 3	14038	13883	156	-
		exon 4	11804	11223	582	-
		exon 5	9843	9655	189	-
	nad3		85690	85334	357	-
	nad4				1482
		exon 1	29243	29701	459	+
		exon 2	31055	31567	513	+
		exon 3	33854	34273	420	+
		exon 4	35940	36029	90	+
	nad4L		119250	119552	303	+
	nad5				1989
		exon 1	54073	54300	228	+
		exon 2	55155	56369	1215	+
		exon 3	103474	103869	396	+
		exon 4	104795	104944	150	+
	nad6		181813	182472	660	+
	nad7				1128
		exon 1	66367	66212	156	-
		exon 2	63773	63309	465	-
		exon 3	62308	62063	246	-
		exon 4	60630	60370	261	-
	nad9		15929	15357	573	-
Complex II	sdh4		38982	38530	453	-
Complex III	cob		99277	100458	1182	+
Complex IV	cox1		1	1584	1584	+
	cox2				729
		exon 1	221286	221675	390	+
		exon 2	222911	223249	339	+
	cox3		39707	38910	798	-
Complex V	atp1		201750	203273	1524	+
	atp4		119785	120315	531	+
	atp6		138180	137461	720	-
	atp8		44606	44136	471	-
	atp9		106123	106347	225	+
Cytochrome c biogenesis	ccmB		189517	188906	612	-
	ccmC		127508	128290	783	+
	ccmFn		2225	3940	1716	+
	ccmFc				1317
		exon 1	196067	195309	759	-
		exon 2	194360	193803	558	-
Ribosomal proteins	rps1		20532	20014	519	-
	rps2		197954	197295	660	-
	rps3				1677
		exon 1	214037	214111	75	+
		exon 2	215854	217455	1602	+
	rps4		168641	169690	1050	+
	rps7		118609	118998	390	+
	rps12		85289	84912	378	-
	rps13		77950	78300	351	+
	Ψrps14		98082	98340	259	+
	Ψrps19		213786	214074	289	+
	rpl5		97522	98076	555	+
	rpl10		96226	95753	474	-
	rpl16		217319	217858	540	+
Other proteins	matR		158573	156612	1962	-
	mttB		43302	42532	771	-
tRNA	trnN-GTT-cp		70722	70651	72	-
	trnD-GTC		69966	70039	74	+
	trnC-GCA		210090	210160	71	+
	trnQ-TTG		73922	73993	72	+
	trnE-TTC		67604	67533	72	-
	trnG-GCC		72733	72662	72	-
	trnH-GTG-cp		150206	150133	74	-
	ΨtrnH-GTG		191157	191091	67	-
	trnI-CAT		68910	68830	81	-
	trnK-TTT		94640	94568	73	-
	trnM-CAT-cp		198869	198797	73	-
	trnfM-CAT		172112	172039	74	-
	trnF-GAA		212105	212178	74	+
	trnP-TGG		212325	212399	75	+
	trnS-GGA-cp		105233	105147	87	-
	trnS-GCT		211761	211848	88	+
	trnS-TGA		45484	45398	87	-
	trnS-TGA		96955	97041	87	+
	trnW-CCA		123540	123613	74	+
	trnY-GTA		14641	14559	83	-
rRNA	rrn5		126685	126803	119	+
	rrn26		175130	172512	2619	-
	Ψrrn26		175418	175140	279	-
	rrn18		124621	126562	1942	+
Putative ORF	orf115a		19127	18780	348	-
	orf129		22415	22804	390	+
	orf107a		26004	26327	324	+
	orf107b		26490	26813	324	+
	orf116a		27724	28074	351	+
	orf107c		46987	46664	324	-
	orf100a		56718	57020	303	+
	orf116b		78800	79150	351	+
	orf307		84450	83527	924	-
	orf99a		94364	94065	300	-
	orf107d		103115	103438	324	+
	orf113		107042	107383	342	+
	orf112		110499	110837	339	+
	orf114		111130	111474	345	+
	orf257		111825	112598	774	+
	orf115b		113772	113425	348	-
	orf111		114469	114804	336	+
	orf105		116075	116392	318	+
	orf143a		120699	121130	432	+
	orf100b		121123	120821	303	-
	orf125		128579	128956	378	+
	orf172		132119	132637	519	+
	orf99b		134984	134685	300	-
	orf139		136005	136424	420	+
	orf100c		139752	139450	303	-
	orf126		145095	145475	381	+
	orf121		146128	146493	366	+
	orf117a		147196	147549	354	+
	orf101		153486	153791	306	+
	orf106		154610	154290	321	-
	orf117b		154804	154451	354	-
	orf150		159198	159650	453	+
	orf143b		166461	166030	432	-
	orf161		171133	170648	486	-
	orf120		179396	179758	363	+
	orf99c		193656	193357	300	-
	orf130a		198383	197991	393	-
	orf130b		207211	207603	393	+
	orf102		209373	209681	309	+
