# Supplementary material for: The Mitochondrial Genome of an Aquatic Plant, Spirodela polyrhiza
Source: PLoS One. 2012 Oct 4;7(10):e46747. doi: 10.1371/journal.pone.0046747 (PMC3464924; doi:10.1371/journal.pone.0046747)
Supplement: Table S7 — Predicted repeat pairs in Spirodela mtDNA by using REPuter. “F” and “P” means forward and palindromic matches. (XLS) [file pone.0046747.s007.xls]

## Sheet: Table S7
Repeat length	Start position	Match direction	Repeat length	Start position	E-value
1535	45070	P	1174	96196	0
236	50135	F	236	104843	8.53e-130
137	124339	P	137	175911	1.99e-70
128	13019	F	128	64008	4.87e-65
134	85318	P	134	120516	3.28e-64
129	82501	P	129	222228	2.36e-63
110	13037	F	110	64026	8.71e-57
104	82526	P	104	222228	3.57e-53
113	92268	F	113	199599	8.61e-52
89	107193	F	89	221998	1.18e-37
80	76738	F	80	221186	2.41e-36
79	92302	F	79	199633	1.11e-33
63	71140	F	63	88350	1.73e-28
62	25586	P	62	162923	6.9e-28
62	54713	F	62	214604	6.9e-28
62	119173	P	62	198625	6.9e-28
69	150140	F	69	191090	5.96e-26
57	34898	F	57	223562	7.07e-25
65	115922	P	65	219551	1.27e-23
63	39865	F	63	160103	1.85e-22
52	125889	P	52	173932	7.24e-22
53	81634	P	53	172361	2.88e-20
51	48719	F	51	80393	4.43e-19
54	107228	F	54	222033	5.83e-19
50	77888	F	50	120636	1.28e-16
50	106264	F	50	119017	1.28e-16
50	150160	F	50	191110	1.28e-16
50	124431	P	50	175906	6.13e-15
50	131626	P	50	163414	6.13e-15
