# Supplementary material for: The Mitochondrial Genome of an Aquatic Plant, Spirodela polyrhiza
Source: PLoS One. 2012 Oct 4;7(10):e46747. doi: 10.1371/journal.pone.0046747 (PMC3464924; doi:10.1371/journal.pone.0046747)
Supplement: Table S8 — Protein-coding and tRNA gene list in the 8 representative plant mtDNAs. “+” means present and “–“ means absent. (XLS) [file pone.0046747.s008.xls]

## Sheet: Table S8
Taxon	Cycad	Spirodela	Phoenix	Oryza	Zea	Arabidopsis	Nicotiana	Boea
GI #	NC_010303	JQ804980	NC_016740	NC_011033	NC_007982	NC_001284	NC_006581	NC_016741
Size (bp)	414903	228493	715001	490520	569630	430597	430597	366924
Citation	Chaw, 2008	/	Fang, 2012	Notsu, 2002	Clifton, 2004	Unseld, 1997	Sugiyama, 2005	Zhang, 2012
atp1	+	+	+	+	+	+	+	+
atp4	+	+	+	+	+	+	+	+
atp6	+	+	+	+	+	+	+	+
atp8	+	+	+	+	+	+	+	+
atp9	+	+	+	+	+	+	+	+
ccmB	+	+	+	+	+	+	+	+
ccmC	+	+	+	+	+	+	+	+
ccmFC	+	+	+	+	+	+	+	+
ccmFN	+	+	+	+	+	+	+	+
cob	+	+	+	+	+	+	+	+
cox1	+	+	+	+	+	+	+	+
cox2	+	+	+	+	+	+	+	+
cox3	+	+	+	+	+	+	+	+
matR	+	+	+	+	+	+	+	+
mttB	+	+	+	+	+	+	+	+
nad1	+	+	+	+	+	+	+	+
nad2	+	+	+	+	+	+	+	+
nad3	+	+	+	+	+	+	+	+
nad4	+	+	+	+	+	+	+	+
nad4L	+	+	+	+	+	+	+	+
nad5	+	+	+	+	+	+	+	+
nad6	+	+	+	+	+	+	+	+
nad7	+	+	+	+	+	+	+	+
nad9	+	+	+	+	+	+	+	+
rpl10	+	+	+	Y	-	-	+	-
rpl16	+	+	+	+	+	+	+	+
rpl2	+	-	+	+	-	+	-	-
rpl5	+	+	+	+	-	+	+	+
rps1	+	+	+	+	+	-	+	-
rps10	+	-	+	-	-	-	+	+
rps11	+	-	+	-	-	-	-	-
rps12	+	+	+	+	+	+	+	+
rps13	+	+	+	+	+	-	+	+
rps14	+	Y	+	Y	-	+	+	+
rps19	+	Y	+	+	-	+	+	+
rps2	+	+	+	+	+	-	-	-
rps3	+	+	+	+	+	+	+	+
rps4	+	+	+	+	+	+	+	+
rps7	+	+	+	+	+	+	-	-
sdh3	+	-	-	-	-	-	+	+
sdh4	+	+	+	-	-	+	+	+
tRNA-Arg	+	-	-	+	+	-	-	-
tRNA-Asn	+	+	-	+	+	+	+	+
tRNA-Asp	+	+	+	+	+	+	+	+
tRNA-Cys	+	+	+	+	+	+	+	+
tRNA-Gln	+	+	+	+	+	+	+	+
tRNA-Glu	+	+	+	+	+	+	+	+
tRNA-Gly	+	+	-	-	-	+	+	+
tRNA-Lys	+	+	+	+	+	+	+	+
tRNA-His	+	+	-	+	+	+	+	-
tRNA-Ile	+	+	-	+	+	+	+	+
tRNA-Leu	+	-	-	-	+	-	-	-
tRNA-Met	+	+	+	+	+	+	+	+
tRNA-Phe	+	+	+	+	+	+	+	-
tRNA-Pro	+	+	+	+	+	+	+	+
tRNA-Ser	+	+	+	+	+	+	+	+
tRNA-Thr	-	-	+	-	-	-	-	-
tRNA-Trp	+	+	-	+	-	+	+	+
tRNA-Tyr	+	+	+	+	+	+	+	+
tRNA-Val	+	-	-	+	+	-	-	-
