# Supplementary material for: The Mitochondrial Genome of an Aquatic Plant, Spirodela polyrhiza
Source: PLoS One. 2012 Oct 4;7(10):e46747. doi: 10.1371/journal.pone.0046747 (PMC3464924; doi:10.1371/journal.pone.0046747)
Supplement: Table S9 — The regions in Spirodela mtDNA originated from cpDNA with corresponding coordinates and identity. (XLS) [file pone.0046747.s009.xls]

## Sheet: Table S9
% identity	cpDNA start	cpDNA end	Annotation in cp	mtDNA start	mtDNA end
95.92	228	324	trnH-GUG	150132	150228
97.1	237	305	trnH-GUG	191091	191159
90.27	533	1564	psbA	150343	151372
90	4476	4645	trnK-UUU	162465	162632
74.73	37978	38421	psbD	188802	188408
81.09	38572	39513	psbC	188311	187390
86.96	49498	49584	-	105747	105658
83.17	49595	50177	trnS-GCU	105672	105093
92.23	50705	50807	rps4	50125	50023
89.24	54083	54431	ndhJ	226358	226697
75.16	55330	55911	ndhC	16666	16132
94.59	58264	58337	trnM-CAU	198870	198797
85.67	72721	73072	trnP-UGG	123630	123282
81.01	73632	74204	rpl33	123301	122745
93.21	80853	81073	psbN	225145	225359
89.95	81266	82267	petB	225358	226349
90.79	84750	84977	rpoA	90484	90704
93.39	91223	91461	rpl2	150090	149853
100	108036	108139	rrn16	171055	171158
74.86	108322	109185	rrn16	124907	125765
100	110069	110156	ycf68	37345	37432
85.71	112278	112374	-	175279	175183
95.05	116140	116341	trnN-GUU	70647	70848
84.99	118231	118785	-	70899	71440
